# Supplementary material for: Feasibility Study of Closed-Loop Recycling for Plastic Generated from Waste Electrical and Electronic Equipment (WEEE) in South Korea
Source: MDPI journal article supplement (doi:10.3390/en16176358), 2023-09-01
Supplement: s1 [file s1]

**Table S1.** Number of processing and the weight of small and medium-sized waste electrical and electronic products of M Company in 2021.

| Product                                             | Number of Input | Input Amount (ton) |
|-----------------------------------------------------|-----------------|--------------------|
| General electric/electronic products mixtures       |                 | 6,583.64           |
| Printers                                            | 58,824          | 347.29             |
| Dish dryers& Dishwashers                            | 6,974           | 174.00             |
| Electric water purifiers                            | 10,249          | 140.21             |
| Microwaves                                          | 10,364          | 117.32             |
| Copiers                                             | 1,216           | 98.74              |
| Computers (main units, components, and peripherals) | 28,368          | 65.71              |
| Computers (monitors and laptops)                    | 9,920           | 44.96              |
| Electric ovens                                      | 2,982           | 41.51              |
| Vacuum cleaners                                     | 10,987          | 37.80              |
| Air purifiers                                       | 2,575           | 27.86              |
| Electric bidets                                     | 5,641           | 25.72              |
| Electric irons                                      | 6,426           | 17.48              |
| Electric massagers                                  | 114             | 13.10              |
| Blenders                                            | 4,762           | 10.48              |
| Deep fryers                                         | 2,891           | 9.37               |
| Audio systems                                       | 2,114           | 8.49               |
| Fax machines                                        | 1,698           | 8.32               |
| Treadmills                                          | 173             | 7.37               |
| Food waste disposers                                | 596             | 6.19               |
| Electric rice cookers                               | 544             | 3.02               |
| Fans                                                | 1,206           | 2.92               |
| Humidifiers                                         | 1,452           | 2.61               |
| Video players                                       | 955             | 1.27               |
| Dehumidifiers                                       | 77              | 1.19               |
| Electric frying pans                                | 296             | 0.89               |
| Scanners                                            | 244             | 0.76               |
| Navigation systems                                  | 1,236           | 0.57               |
| Wireless routers                                    | 617             | 0.19               |
| Beam Projectors                                     | 32              | 0.17               |
| Electric kettles                                    | 105             | 0.11               |
| Water softeners                                     | 11              | 0.10               |
| Electric heaters                                    | 32              | 0.10               |
| Hair dryers                                         | 244             | 0.09               |
| Spin dryers                                         | 10              | 0.07               |
| Toasters                                            | 55              | 0.07               |
| Coffee makers                                       | 13              | 0.03               |
| Food dehydrators                                    | 13              | 0.02               |
| Electric water heaters                              | 1               | 0.02               |
| Herbal medicine baths                               | 3               | 0.01               |
| Video game consoles                                 | 3               | 0.01               |
| Total                                               |                 | 7800               |
